# Supplementary material
Source: PubMed Central journal article supplement (PMC5159774)
Supplement: ejhg2016141x1.pdf [file ejhg2016141x1.pdf]

## Supplementary Information

### MATERIALS AND METHODS

#### Study subjects

##### *Exome-sequenced HBOC patients*

Clinical characteristics of 24 exome-sequenced HBOC patients are presented in Table 1.

**Table 1. Clinical characteristics of 24 exome-sequenced patients.**

| Family id/<br>patient id | Gender | Cancer type<br>(age at dg) | Cancer histological type, grade and<br>hormone receptor status | Other cancers<br>in the family (age at dg) |
|--------------------------|--------|----------------------------|----------------------------------------------------------------|--------------------------------------------|
| <u>110</u>               |        |                            |                                                                |                                            |
| 110010                   | female | breast (26)                | ductal, grade II, ER+, PR+, HER2+                              | prostate (64),                             |
| 110007                   | female | breast (48)                | ductal, grade II, ER+, PR+, HER2-                              | unknown (84)                               |
| <u>235</u>               |        |                            |                                                                |                                            |
| 235054                   | female | breast (52)                | lobular, grade II, ER-, PR+, HER2 na                           | -                                          |
| 235002                   | female | breast (56)                | ductal, grade na, ER+, PR-, HER2+                              |                                            |
| 235004                   | female | bil breast (28)            | ductal, gr III, ER na, PR na, HER2 na                          |                                            |
| <u>236</u>               |        |                            |                                                                |                                            |
| 236055                   | female | breast (29)                | intraductal, grade na, ER na, PR na, HER2 na                   | -                                          |
| 236002                   | female | breast (52)                | ductal, grade na, ER na, PR na, HER na                         |                                            |
| <u>240</u>               |        |                            |                                                                |                                            |
| 240059                   | female | breast (53)                | ductal, grade III, ER+, PR-, HER2+                             | breast (62), thyroid (38)                  |

|                            |        |                                    |                                                                                         |                              |
|----------------------------|--------|------------------------------------|-----------------------------------------------------------------------------------------|------------------------------|
| 240010<br><u>260</u>       | female | breast (42)                        | ductal, grade II, ER+, PR+, HER na                                                      |                              |
| 260075                     | female | breast (29)                        | ductal, grade III, ER-, PR-, HER2-                                                      | breast (65), lung (60)       |
| 260002<br><u>271</u>       | female | breast (58)                        | ductal, grade III, ER na, PR na, HER2 na                                                |                              |
| 271310                     | female | breast (65)                        | lobular, grade II, ER+, PR+, HER2-                                                      | breast (55)                  |
| 271009                     | female | bil breast (44, 50)                | ductal in situ, grade I, ER+, PR+, HER2- and<br>ductal, grade na, ER na, PR na, HER2 na |                              |
| 271010<br><u>TuFamBC21</u> | female | breast (66)                        | lobular, grade II, ER na, PR na, HER2 na                                                |                              |
| 904001                     | female | breast (28)                        | ductal, grade III, ER-, PR-, HER2-                                                      | -                            |
| 903001<br><u>TuFamBC22</u> | female | breast (45)                        | na                                                                                      |                              |
| 906001                     | female | bil breast (59, 61)                | ductal, grade I, ER+, PR+, HER2- and<br>ductal, grade III, ER+, PR+, HER2-              | 3x breast (49, 50, 56)       |
| <u>TuFamBC23</u>           |        |                                    |                                                                                         |                              |
| 913001                     | female | breast (28)                        | ductal, grade III, ER-, PR+, HER2+                                                      | -                            |
| 914001<br><u>TuFamBC24</u> | female | bil breast (36, 38)                | na                                                                                      |                              |
| 918001<br><u>TuFamBC25</u> | female | breast (49)                        | ductal, grade III, ER-, PR-, HER2-                                                      | 3x breast (-), 2 x ovary (-) |
| 908001                     | female | bil breast (41, 69),<br>ovary (55) | ductal, grade II, ER+, PR+, HER2- and na                                                | breast (-)                   |
| <u>TuFamBC26</u>           |        |                                    |                                                                                         |                              |
| 909001                     | female | breast (64)                        | ductal, grade II, ER-, PR-, HER2-                                                       | 3x breast (-)                |
| 907001<br><u>TuFamBC27</u> | female | breast (47)                        | ductal, grade II, ER+, PR+, HER2-                                                       |                              |
| 910001                     | male   | breast (72)                        | ductal, grade II, ER+, PR+, HER2-                                                       | breast (28)                  |

Abbreviations: ER, estrogen receptor; HER2, human epidermal growth factor receptor 2; PR, progesterone receptor.

*Genotyped female HBOC patients*

A cohort of 129 female HBOC patients comprised index individuals from 65 HBOC families recruited from the Genetics Outpatient Clinic of Tampere University Hospital and index individuals from 64 HBOC families recruited from the Department of Clinical Genetics of Turku University Hospital. The clinical characteristics of 65 Tampere patients and 20 Turku patients have been previously described<sup>1,2</sup>, whereas the description of the remaining 44 HBOC patients collected from the Turku region have been presented below (Table 2). The Ethical Committees of Tampere and Turku University Hospitals and the National Authority for Medicolegal Affairs and the Auria Biobank have provided permission for the research project

**Table 2. Clinical features of 44 HBOC patients collected from the Turku region.**

| <b>Sample id</b> | <b>Cancer (age at dg)</b> | <b>Histology, grade</b>         | <b>Receptor status</b>                   | <b>Family history of cancer (age at dg if known)</b> |
|------------------|---------------------------|---------------------------------|------------------------------------------|------------------------------------------------------|
| TuFam28          | Breast (43)               | Lobular, 2                      | ER+, PR+, HER2-                          | 2x Breast (48, -)                                    |
| TuFam29          | Breast (62)               | Ductal, 3                       | ER+, PR+, HER2-                          | 5x Breast (32, 38, 39, 41, 45), Pancreas (46)        |
| TuFam30          | Bil. Breast (42, 64)      | na and DCIS, 3                  | na                                       | Breast (48)                                          |
| TuFam31          | Breast (67)               | Ductal                          | ER+, PR+, HER2 na                        | 7x Breast (48, 52, 61, 61, 70, 72, 75)               |
| TuFam32          | Breast (42)               | Lobular, 2                      | ER+, PR+, HER2-                          | 6x Breast (44, 47, 50, -, -, -)                      |
| TuFam33          | Breast (46)               | na                              | na                                       | 2x Breast (60, 80)                                   |
| TuFam34          | Breast (52)               | Ductal, 2                       | ER-, PR+, HER2 na                        | Ovarian (42)                                         |
| TuFam35          | Bil. Breast (40, 40)      | Ductal, 1 and Ductal, 3         | ER+, PR+, HER2 -                         | 3x Breast (43, 49, 70), Uterus (22)                  |
| TuFam36          | Breast (50, 60)           | Ductal tubular, 1 and DCIS, 2-3 | na                                       | 4x Breast (35, 40, 45, 45)                           |
| TuFam37          | Breast (48)               | Lobular, 1                      | ER+, PR+, HER2-                          | 6x Breast (50, 50, 51, 55, 60, 65)                   |
| TuFam38          | Breast (28)               | Ductal, 3                       | ER+, PR+, HER2+                          | Breast (78)                                          |
| TuFam39          | Breast (49)               | Ductal, 2                       | ER+, PR+, HER2-                          | 2x Breast (53, 65), Ovarian (86)                     |
| TuFam40          | Breast (34)               | Ductal, 3                       | ER+, PR-, HER2-                          | 3x Breast (54, 61, -)                                |
| TuFam41          | Breast (59)               | Ductal, 1                       | ER+, PR+, HER2-                          | 2x Breast (56, 58), Ovarian (27)                     |
| TuFam42          | Breast (49)               | Ductal, 3                       | ER+, PR+, HER2+                          | 4x Breast (43, 54, 70, -)                            |
| TuFam43          | Breast (49), Ovarian (77) | na and endometrioid, 2          | na and ER-, PR+, HER2 na                 | 3x Breast (62, 69, 69)                               |
| TuFam44          | Breast (53, 62)           | Lobular, 2 and Ductal, 3        | ER-, PR-, HER2- and<br>ER+, PR+, HER2+   | 6x Breast (49, 50, 50, 50, 52, 59)                   |
| TuFam45          | Breast (58, 65)           | Ductal tubular and Ductal, 2    | ER+, PR+, HER2 na and<br>ER+, PR+, HER2- | 5x Breast (41, 48, 62, 69, 70)                       |
| TuFam46          | Breast (41)               | Ductal, 3                       | ER-, PR-, HER2-                          | 3x Breast (59, 63), Ovarian (53, 74)                 |
| TuFam47          | Breast (55)               | Mucinous, 2                     | ER+, PR+, HER2-                          | 5x Breast (45, 51, 55, 57, 81)                       |
| TuFam48          | Breast (42)               | Ductal, 2                       | ER+, PR+, HER2-                          | Breast (38)                                          |
| TuFam49          | Breast (44, 55)           | Ductal, 1 and Ductal, 1         | ER+, PR-, HER2-                          | 2x Breast (47, 70)                                   |
| TuFam50          | Breast (51)               | Lobular, 2                      | ER+, PR+, HER2-                          | 2x Breast (46, 64)                                   |
| TuFam51          | Breast (36)               | DCIS, na                        | na                                       | 2x Breast (65, -)                                    |
| TuFam52          | Breast (50)               | Ductal, 2                       | ER+, PR+, HER2-                          | 4x Breast (42, 50, 54, 54)                           |

|         |                      |                         |                        |                                                  |
|---------|----------------------|-------------------------|------------------------|--------------------------------------------------|
| TuFam53 | Breast (56)          | Ductal, 2               | ER+, PR+, HER2-        | 4x Breast (61, -, -, -), and Ovarian 2x (67, 78) |
| TuFam54 | Breast (49)          | Ductal, na              | ER+, PR+, HER2 na      | 2x Breast (35, 59), Pancreas (59)                |
| TuFam55 | Breast (50, 62)      | DCIS, na and Ductal, 3  | ER+, PR-, HER2+        | 2x Breast (42, 56)                               |
| TuFam56 | Breast (37, 46)      | Ductal, 2 and Ductal, 2 | na and ER+, PR+, HER2- | -                                                |
| TuFam57 | Breast (58)          | Ductal, na              | ER+, PR+, HER2-        | 3x Breast (49, 65, 65)                           |
| TuFam58 | Breast (67)          | Ductal, 3               | ER+, PR+, HER2-        | 2x Breast (30, 58)                               |
| TuFam59 | Breast (39)          | Ductal, 3               | ER+, PR+, HER2-        | Breast (55)                                      |
| TuFam60 | Breast (46)          | Ductal, 3               | ER+, PR+, HER2-        | Breast (36)                                      |
| TuFam61 | Breast (50, 68)      | Ductal, 2               | ER+, PR na and HER2 na | 3x Breast (55, 63, 82)                           |
| TuFam62 | Breast (53)          | Ductal, 2               | ER+, PR+, HER2-        | 3x Breast (33, 70, 70)                           |
| TuFam63 | Breast (64)          | Ductal, 1               | ER+, PR+, HER2-        | 4x Breast (49, 51, 71, 81)                       |
| TuFam64 | Breast (25)          | Ductal, 3               | ER+, PR-, HER2+        | Breast (-)                                       |
| TuFam65 | Breast (48)          | Ductal, 2               | ER+, PR+, HER2-        | 3x Breast (39, -, -)                             |
| TuFam66 | Breast (52)          | Ductal, 1               | ER+, PR+, HER2-        | 4x Breast (49, 52, 58, 60) and Ovarian (45)      |
| TuFam67 | Breast (34, 37)      | Ductal, 3 and LCIS, na  | ER-, PR-, HER2 na      | Breast (61)                                      |
| TuFam68 | Bil. Breast (42, 44) | Ductal, 1               | ER+, PR+, HER2-        | 2x Breast (32, 51)                               |
| TuFam69 | Breast (25)          | Ductal, 3               | ER-, PR-, HER2-        | 2x Breast (50, 70)                               |
| TuFam70 | Breast (33)          | Ductal, 3               | ER+, PR+, HER2-        | Ovarian (60)                                     |
| TuFam71 | Breast (53)          | Ductal, 3               | ER+, PR+, HER2-        | 2x Breast (47, 60)                               |

Abbreviations: DCIS, ductal carcinoma in situ; ER, estrogen receptor; HER2, human epidermal growth factor receptor 2; PR, progesterone receptor

### *Genotyped male BC patients*

A cohort of 49 male BC patients comprised 45 Finnish male BC patients from the previously described cohort<sup>3,4</sup> and 5 additional male BC patients collected from the Turku region (described below, Table 3).

**Table 3. Clinical feature of 5 male breast cancer patients.**

| <b>Sample id</b> | <b>Cancer (age at dg)</b> | <b>Histology, grade</b> | <b>Receptor status</b> | <b>Family history of cancer (age at dg if known)</b> |
|------------------|---------------------------|-------------------------|------------------------|------------------------------------------------------|
| MaleBC1          | Breast (59)               | na                      | na                     | Pancreas                                             |
| MaleBC2          | Breast (70)               | Ductal, 2               | ER+, PR+, HER2-        | Breast (75)                                          |
| MaleBC3          | Breast (60)               | Ductal, 2               | ER+, PR+, HER2-        | Pancreas (42)                                        |
| MaleBC4          | Breast (72)               | Ductal, 3               | ER+, PR+, HER2-        | Breast (49)                                          |
| MaleBC5          | Bil. Breast (72, 72)      | Ductal, 2 and Ductal, 2 | ER+, PR+, HER2-        | -                                                    |

Abbreviations: BC, breast cancer; ER, estrogen receptor; HER2, human epidermal growth factor receptor 2; PR, progesterone receptor

### *Genotyped female and male population controls*

Population controls were female and male blood donors whose blood samples were obtained from the Finnish Red Cross. The blood samples were collected from the Tampere, Turku, and Kuopio region during years 1997-1998.

### *Genotyped breast or breast and ovarian cancer patients*

Breast or breast and ovarian cancer patients were *BRCA1/2*-negative Finnish females whose FFPE tumour and normal tissue samples were obtained from the Auria Biobank (Turku, Finland). The patient cohort was selected from the Auria Biobank according the high-risk hereditary breast cancer criteria.<sup>1</sup> DNA was extracted from FFPE tissue using a GeneRead DNA FFPE Kit (Qiagen Inc., Valencia, CA, USA).

## Data-analysis

Reads were aligned with Bowtie2 against the human reference genome (hg19) using the default parameters.<sup>5</sup> Quality control was conducted using FastQC (<http://www.bioinformatics.bbsrc.ac.uk/projects/fastqc/>). As a preprocessing step for variant calling, PCR duplicates and reads with a mapping quality of less than 10 were filtered out using SAMtools.<sup>6</sup> Variant calling was conducted using the Pypette bioinformatics toolkit, which was developed in house (<https://github.com/annalam/pypette>). Variants were annotated with Annovar<sup>7</sup> using the RefSeq genes as the reference gene set. Mapping details are presented in Table 4.

**Table 4. Mapping details.**

| Sample | Total clean reads | Mapped reads | Percent of mapped reads | Uniquely mapped reads | Covered Refseq exon bases by at least 1x(%) | Covered Refseq exon bases by at least 10x(%) | Covered Refseq exon bases by at least 20x(%) | Average Refseq exon base coverage |
|--------|-------------------|--------------|-------------------------|-----------------------|---------------------------------------------|----------------------------------------------|----------------------------------------------|-----------------------------------|
| 110007 | 60491188          | 60012949     | 99,20940716             | 47010716              | 66,33453428                                 | 48,78094263                                  | 43,30561723                                  | 24,76236669                       |
| 110008 | 58209420          | 57771123     | 99,24703424             | 44867326              | 64,63549373                                 | 48,46726826                                  | 43,00549764                                  | 24,46697238                       |
| 110010 | 60558184          | 60101188     | 99,24536046             | 47325260              | 66,61659597                                 | 49,01802351                                  | 43,52106517                                  | 24,69498302                       |
| 235002 | 59193138          | 58759238     | 99,26697584             | 45379527              | 64,78921476                                 | 48,56253537                                  | 43,20337894                                  | 24,69769455                       |
| 235004 | 61760640          | 61132611     | 98,9831242              | 45500133              | 65,30118782                                 | 48,68657899                                  | 42,90494705                                  | 25,080616                         |
| 235054 | 58195244          | 57798309     | 99,31792536             | 45212375              | 64,95049156                                 | 48,46133148                                  | 42,96553328                                  | 24,6047982                        |
| 236002 | 60808422          | 60334723     | 99,22099771             | 46484579              | 65,60290957                                 | 48,96960119                                  | 43,49112982                                  | 24,71913152                       |
| 236055 | 58814280          | 58442017     | 99,36705338             | 45721740              | 64,71632852                                 | 48,07209154                                  | 42,6231848                                   | 24,46985691                       |
| 240006 | 58810690          | 58175447     | 98,91985114             | 45531552              | 65,50264934                                 | 48,90654304                                  | 43,34547659                                  | 24,66973333                       |
| 240010 | 88504896          | 82074829     | 92,7347895              | 58716602              | 66,91307831                                 | 46,59222692                                  | 42,0466292                                   | 28,50163429                       |
| 240059 | 59980372          | 59552145     | 99,28605478             | 46347885              | 65,75528639                                 | 48,97443746                                  | 43,40291684                                  | 24,75347328                       |
| 260002 | 59693288          | 59250280     | 99,25785961             | 46298341              | 66,16488766                                 | 48,80095397                                  | 43,20766301                                  | 24,84404285                       |
| 260075 | 59088498          | 58659812     | 99,27450178             | 44972059              | 65,54688999                                 | 48,53900603                                  | 42,42204475                                  | 24,78177083                       |
| 271009 | 59733374          | 59107365     | 98,95199458             | 45571318              | 65,40931233                                 | 48,90224989                                  | 43,33818006                                  | 24,5334661                        |
| 271010 | 60092600          | 59393952     | 98,83738098             | 46510011              | 67,20396868                                 | 48,8489589                                   | 42,74072649                                  | 24,62669157                       |
| 271310 | 61779310          | 61165179     | 99,00592771             | 47312682              | 66,28092182                                 | 49,10908821                                  | 43,64587747                                  | 25,17704649                       |

|        |          |          |             |          |             |             |             |             |
|--------|----------|----------|-------------|----------|-------------|-------------|-------------|-------------|
| 901001 | 69302282 | 68682551 | 99,10575672 | 54382071 | 69,50733416 | 49,20009977 | 44,19181589 | 26,19568664 |
| 902001 | 69309726 | 68724458 | 99,15557594 | 54739562 | 70,10789093 | 48,74817629 | 43,43654648 | 25,23277051 |
| 903001 | 80511072 | 79808420 | 99,12726041 | 60853055 | 70,17648532 | 49,79009089 | 45,4032773  | 29,29334984 |
| 904001 | 71546050 | 70931520 | 99,14107068 | 58053244 | 72,16295398 | 48,59816769 | 43,34950919 | 25,4020256  |
| 905001 | 67551268 | 66920005 | 99,06550533 | 53830482 | 69,62274613 | 49,24161313 | 44,15172191 | 25,87519494 |
| 906001 | 64475984 | 63786899 | 98,93125322 | 53085265 | 71,84213604 | 48,25745248 | 42,56034182 | 23,4224397  |
| 907001 | 64794038 | 64194634 | 99,07490871 | 50641261 | 66,0475793  | 49,0222311  | 44,24810638 | 26,39046334 |
| 908001 | 71505520 | 70977311 | 99,26130318 | 58128806 | 72,42381826 | 48,60090276 | 43,28278916 | 25,32205747 |
| 909001 | 56773622 | 55311763 | 97,42510879 | 47131927 | 70,41996444 | 47,56020014 | 40,84741077 | 20,94776499 |
| 910001 | 71315452 | 70005927 | 98,16375699 | 54494257 | 67,43354952 | 49,3134559  | 44,76439463 | 27,73496163 |
| 911001 | 68414044 | 67127410 | 98,11934228 | 52915217 | 68,36603819 | 49,09700596 | 44,24888283 | 26,58449736 |
| 912001 | 78198362 | 76794384 | 98,20459411 | 58551580 | 68,63834697 | 49,82562729 | 45,72116445 | 29,61127415 |
| 913001 | 87259344 | 85998302 | 98,55483443 | 64659281 | 71,59798417 | 50,07045191 | 46,09756384 | 31,0629815  |
| 914001 | 94334968 | 93467950 | 99,08091557 | 70579887 | 74,7986169  | 50,08224379 | 46,00202322 | 30,93105567 |
| 915001 | 83917780 | 83235674 | 99,18717345 | 63516628 | 72,17614451 | 50,05195846 | 45,86124904 | 29,78729119 |
| 916001 | 73148646 | 72286833 | 98,82183328 | 57706345 | 72,31226131 | 49,60215822 | 44,6189475  | 26,29584592 |
| 917001 | 86584818 | 85865504 | 99,16923773 | 65202084 | 72,60745779 | 50,24442148 | 46,06804329 | 30,4530826  |
| 918001 | 68555520 | 67968552 | 99,14380636 | 54758769 | 70,4076385  | 49,80081079 | 44,83297995 | 26,23011572 |
| 919001 | 68544808 | 67915845 | 99,08240607 | 53985423 | 69,5044941  | 49,59081742 | 44,64440045 | 26,17306783 |
| 920001 | 70275238 | 69642454 | 99,09956335 | 55811498 | 71,09376132 | 49,4860748  | 44,39464494 | 26,0225829  |
| 921001 | 72088582 | 71519283 | 99,21027854 | 57521350 | 71,48915192 | 49,7356955  | 44,77809717 | 26,47399846 |

Based on the variant annotation, functional variants (splice-site Single Nucleotide Variants (SNVs)/indels, non-synonymous SNVs, stop gain/loss variants, and insertions/deletions (indels) inducing frameshift) were prioritized. Moreover, rare variants (Minor Allele Frequency (MAF)  $\leq 0.05$ ) were selected from this set of variants by screening them against the 1000 Genomes project<sup>8</sup> (August 2014 version) and Exome SequencingProject 6500 (ESP6500) (included in Annovar) (<https://esp.gs.washington.edu/drupal/>). In addition, the Sequencing Initiative Suomi (SISU) database was utilized to obtain information about allele frequencies in the Finnish population (<http://www.sisuproject.fi/>). From the remaining set of variants, only those variants for which the host genes participate in the DNA damage response pathway were retained. The pathway data were retrieved from the InPath database, which includes data integrated from several sources: KEGG, Wikipathways and BioCyc.<sup>9</sup>



To further narrow down the list of candidates, the deleteriousness of the remaining variants was evaluated by utilizing a precompiled set of pathogenicity predictions included in the Annovar ljb26\_all dataset. This dataset covers predictions of the deleteriousness of all possible SNVs for 11 pathogenicity predictor methods and 3 methods evaluating the evolutionary conservation of the variant locus (Table 5). Only variants that were predicted to be deleterious by at least one of the predictors or that were frameshift indels were selected for further assessment. Furthermore, variants present only in healthy relatives were excluded.

**Table 5. List of software included in the Annovar ljb26\_all dataset.**

| Software/Method     | Predictor type                  | Website / data source                                                                                                                     |
|---------------------|---------------------------------|-------------------------------------------------------------------------------------------------------------------------------------------|
| SIFT                | Pathogenicity predictor         | <a href="http://sift.jcvi.org/">http://sift.jcvi.org/</a>                                                                                 |
| PolyPhen2 HVAR      | Pathogenicity predictor         | <a href="http://genetics.bwh.harvard.edu/pph2/">http://genetics.bwh.harvard.edu/pph2/</a>                                                 |
| PolyPhen2 HDIV      | Pathogenicity predictor         | <a href="http://genetics.bwh.harvard.edu/pph2/">http://genetics.bwh.harvard.edu/pph2/</a>                                                 |
| Mutation Assessor   | Pathogenicity predictor         | <a href="http://mutationassessor.org/">http://mutationassessor.org/</a>                                                                   |
| Mutation Taster     | Pathogenicity predictor         | <a href="http://www.mutationtaster.org/">http://www.mutationtaster.org/</a>                                                               |
| LR                  | Pathogenicity predictor         | <a href="http://genomics.usc.edu/members/15-member-detail/36-coco-dong">http://genomics.usc.edu/members/15-member-detail/36-coco-dong</a> |
| LRT                 | Pathogenicity predictor         | Chun S, Fay JC. Identification of deleterious mutations within three human genomes. <i>Genome Res.</i> 2009;19:1553–1561.                 |
| RadialSVM (MetaSVM) | Pathogenicity predictor         | <a href="http://genomics.usc.edu/members/15-member-detail/36-coco-dong">http://genomics.usc.edu/members/15-member-detail/36-coco-dong</a> |
| VEST3               | Pathogenicity predictor         | <a href="http://karchinlab.org/apps/appVest.html">http://karchinlab.org/apps/appVest.html</a>                                             |
| CADD                | Pathogenicity predictor         | <a href="http://cadd.gs.washington.edu/">http://cadd.gs.washington.edu/</a>                                                               |
| FATHMM              | Pathogenicity predictor         | <a href="http://fathmm.biocompute.org.uk/">http://fathmm.biocompute.org.uk/</a>                                                           |
| GERP++              | Evolutionary conservation score | <a href="http://mendel.stanford.edu/SidowLab/downloads/gerp/">http://mendel.stanford.edu/SidowLab/downloads/gerp/</a>                     |

|        |                                 |                                                                                                               |
|--------|---------------------------------|---------------------------------------------------------------------------------------------------------------|
| phyloP | Evolutionary conservation score | <a href="http://compgen.bscb.cornell.edu/phast/">http://compgen.bscb.cornell.edu/phast/</a>                   |
| SiPhy  | Evolutionary conservation score | <a href="http://www.broadinstitute.org/genome_bio/siphy/">http://www.broadinstitute.org/genome_bio/siphy/</a> |

## Variant validation

### *Sanger sequencing*

Genomic DNA was amplified by PCR. PCR primers were designed with Primer3 software.<sup>10, 11</sup> Primer sequences and PCR conditions are available upon request. PCR products were visualized with 1.5% agarose gel. PCR products were purified by using rAPid Alkaline Phosphatase (Roche Diagnostics GmbH, Mannheim, Germany) and Exonuclease I (New England Biolabs, Ipswich, MA, USA). Sequencing was conducted by using a Big Dye Terminator v3.1 Cycle Sequencing Kit and and ABIPRISM 3130 × 1 Genetic Analyzer (Applied Biosystems, Foster City, CA, USA) as indicated by the manufacturer. Sequences were analysed with Sequencher™ v5.1 software (Gene Codes Corporation, Ann Arbor, MI, USA).

### *TaqMan SNP genotyping*

Genotyping was performed by using TaqMan® SNP Genotyping Assays (Applied Biosystems, Foster City, CA, USA) run on an ABI PRISM® 7900HT Sequence Detection System (Applied Biosystems) according to the manufacturers' instructions. The following assays were used:

C\_176281813\_10 (*CDKN2A* c.496C>T), C\_\_1244825\_20 (*RAD52* c.538G>A), C\_\_2283286\_20 (*ATM* c.2572T>C), C\_\_45273750\_10 (*ATM* c.3161C>G), C\_166902853\_10 (*RPA2* c.122C>T), C\_\_30585831\_10 (*ATM* c.5558A>T), C\_\_63879305\_20 (*ATM* c.4424A>G), C\_\_32333045\_10 (*RAD50* c.280A>C), C\_153129907\_10 (*BRCAl* c.3904A>C), C\_\_32376001\_10 (*MYC* c.77A>G), C\_102161615\_10 (*RBL2*

c.1723G>C), C\_167350917\_10 (*NCOA3* c.3353A>C), C\_\_15956024\_20 (*PLAU* c.43G>T), C\_\_15760210\_10 (*RADI* c.341G>A), C\_168146154\_10 (*WNT10A* c.337C>T), and C\_190555357\_10 (*WNT3A* c.277G>A). Genotypes were called with SDS v2.2.2 software (Applied Biosystems).

## RESULTS

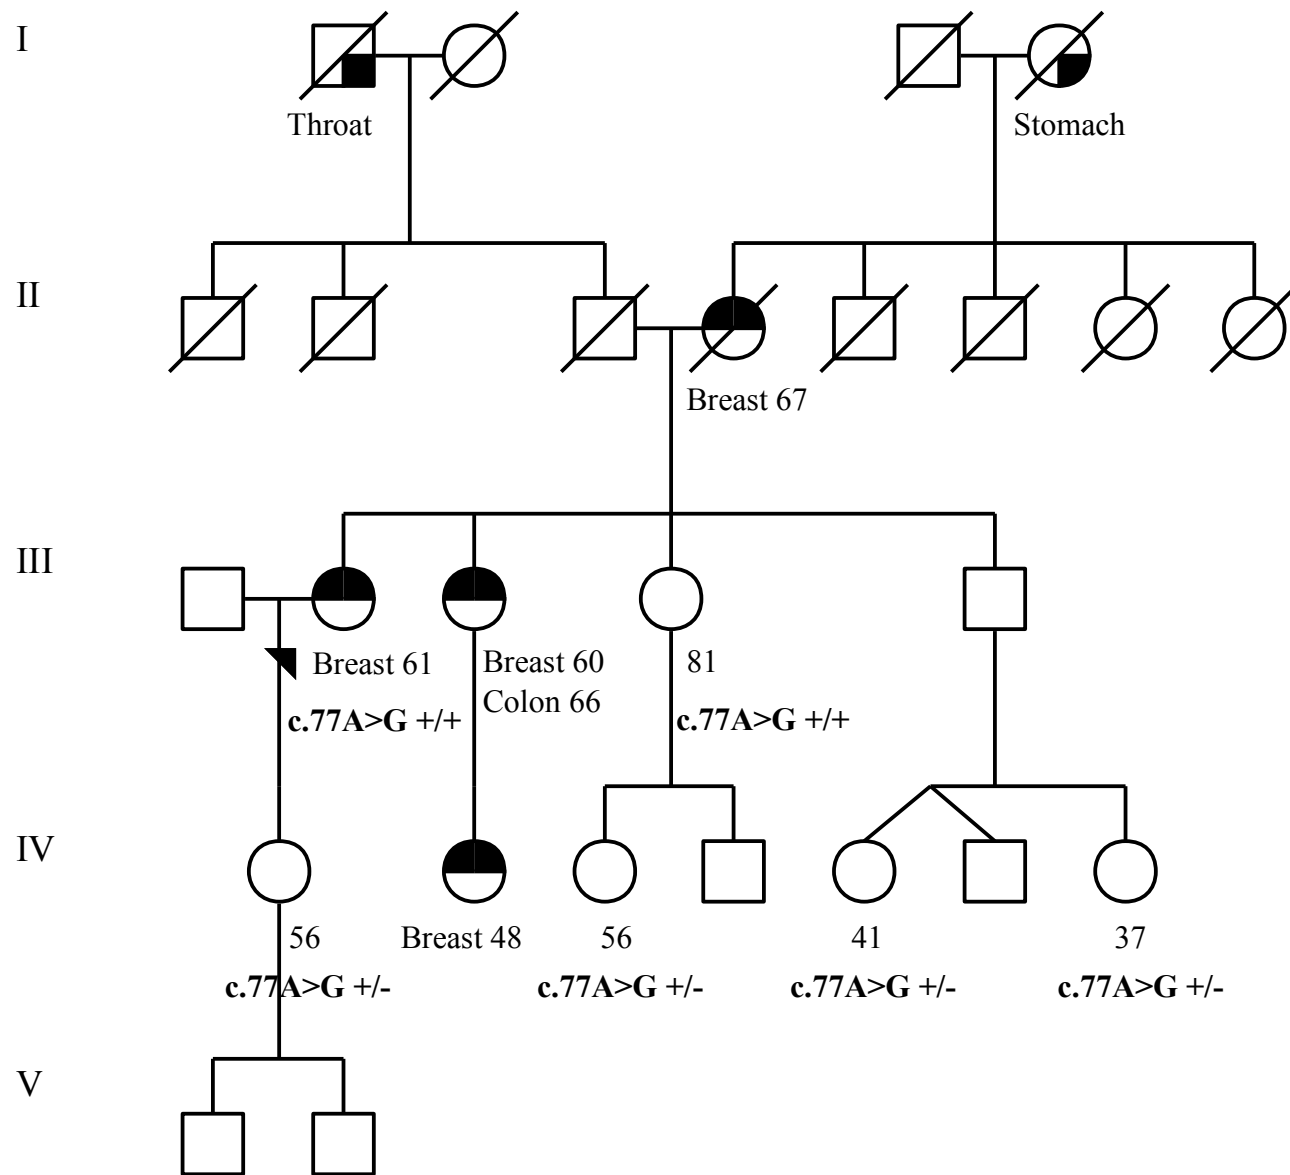

**Figure 1. The *MYC* c.77A>G variant in pedigree 256.** Genotyping identified the *MYC* c.77A>G variant altogether in a total of six individuals in family 256. The variant was present in its homozygous form (+/+) in the index patient and a healthy sister and in its heterozygous form (+/-) in four other healthy relatives in generation IV. No DNA samples were available from the affected relatives. Females are marked with circles, and males are marked with squares. The index patient is marked with an arrow. Breast cancer is marked with a half black circle and with the age at diagnosis. Other cancers are indicated with quarter black circles or squares. The current ages of healthy females are presented. Deceased individuals are indicated with a slash. Generations are presented in Roman numerals.

## REFERENCES

- 1 Kuusisto KM, Bebel A, Vihinen M, Schleutker J, Sallinen SL: Screening for BRCA1, BRCA2, CHEK2, PALB2, BRIP1, RAD50, and CDH1 mutations in high-risk Finnish BRCA1/2-founder mutation-negative breast and/or ovarian cancer individuals. *Breast Cancer Res* 2011; **13**: R20.
- 2 Kuusisto KM, Akinrinade O, Vihinen M, Kankuri-Tammilehto M, Laasanen S, Schleutker J: Copy Number Variation Analysis in Familial *BRCA1/2*-Negative Finnish Breast and Ovarian Cancer. *PLoS ONE* 2013; **8**: e71802.
- 3 Syrjakoski K, Hyytinen ER, Kuukasjarvi T *et al*: Androgen receptor gene alterations in Finnish male breast cancer. *Breast Cancer Res Treat* 2003; **77**: 167-170.
- 4 Syrjakoski K, Kuukasjarvi T, Waltering K *et al*: BRCA2 mutations in 154 finnish male breast cancer patients. *Neoplasia* 2004; **6**: 541-545.

5 Langmead B, Salzberg SL: Fast gapped-read alignment with Bowtie 2. *Nat Methods* 2012; **9**: 357-359.

6 Li H, Handsaker B, Wysoker A *et al*: The Sequence Alignment/Map format and SAMtools. *Bioinformatics* 2009; **25**: 2078-2079.

7 Wang K, Li M, Hakonarson H: ANNOVAR: functional annotation of genetic variants from high-throughput sequencing data. *Nucleic Acids Res* 2010; **38**: e164.

8 1000 Genomes Project Consortium, Abecasis GR, Auton A *et al*: An integrated map of genetic variation from 1,092 human genomes. *Nature* 2012; **491**: 56-65.

9 Zhou H, Jin J, Zhang H, Yi B, Wozniak M, Wong L: IntPath--an integrated pathway gene relationship database for model organisms and important pathogens. *BMC Syst Biol* 2012; **6 Suppl 2**: S2-0509-6-S2-S2. Epub 2012 Dec 12.

10 Untergasser A, Cutcutache I, Koressaar T *et al*: Primer3--new capabilities and interfaces. *Nucleic Acids Res* 2012; **40**: e115.

11 Koressaar T, Remm M: Enhancements and modifications of primer design program Primer3. *Bioinformatics* 2007; **23**: 1289-1291.
